# Supplementary material for: Palladium fabricated on boehmite as an organic–inorganic hybrid nanocatalyst for C–C cross coupling and homoselective cycloaddition reactions
Source: Royal Society of Chemistry journal article supplement (doi:10.1039/c9nj06129k), 2020-01-01

## Supplementary Data

### **Palladium fabricated on boehmite as an organic-inorganic hybrid nanocatalyst for the C-C cross coupling and homoselective cycloaddition reactions**

Bahman Tahmasbi\*, Arash Ghorbani-Choghamarani, Parisa Moradi

*Department of Chemistry, Faculty of Science, Ilam University, P.O. Box 69315516, Ilam, Iran.*

*E-mail address: bah.tahmasbi@gmail.com*

#### **Abstract:**

Herein, boehmite nanoparticles were prepared using aqueous solution of NaOH and  $\text{Al}(\text{NO}_3)_3 \cdot 9\text{H}_2\text{O}$  at room temperature. After modification of boehmite nanoparticles (BNPs) surface by 3-chloropropyltrimoxysilane (CPTMS), adenine was anchored on its surface. Finally, a complex of palladium was fabricated on the BNPs surface (Pd-adenine@boehmite). The obtained nanoparticles were identified by TGA, FT-IR, BET, EDS, WDX, SEM, XRD and AAS techniques. In continuation, the catalytic application of Pd-adenine@boehmite was employed as efficient, reusable and organic-inorganic hybrid catalyst in the C-C cross coupling reactions without phosphine ligand or inert atmosphere. Moreover, the homoselective synthesis of tetrazoles was studied in the presence of Pd-adenine@boehmite as a heterogeneous and practical nanocatalyst which can be recovered and reused in the described organic reactions. Besides, organic products which were isolated in suitable TOF and TON numbers in the presence of Pd-adenine@boehmite as catalyst revealed the practicality of this catalyst. Heterogeneous nature of this catalyst was confirmed by TEM, EDS, WDX, AAS, and FT-IR techniques and, then, compared to the fresh catalyst.

---

\*Address correspondence to B. Tahmasbi, Department of Chemistry, Faculty of Science, Ilam University, P.O. Box 69315516, Ilam, Iran; Tel/Fax: +98 841 2227022; E-mail address: [bah.tahmasbi@gmail.com](mailto:bah.tahmasbi@gmail.com)

## <sup>1</sup>H NMR spectral data

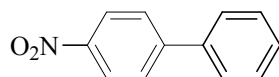

**4-nitro-1,1'-biphenyl:** <sup>1</sup>H NMR (400 MHz, CDCl<sub>3</sub>): δ<sub>H</sub> = 8.35-8.33 (d, *J* = 8 Hz, 2H), 7.79-7.77 (d, *J* = 8 Hz, 2H), 7.67-7.65 (d, *J* = 8 Hz, 2H), 7.57-7.47 (m, 3H) ppm.

<sup>13</sup>C NMR (100 MHz, CDCl<sub>3</sub>): δ = 147.7, 147.1, 138.8, 129.2, 129.0, 127.9, 127.4, 124.2 ppm.

IR (KBr) cm<sup>-1</sup>: 3072, 3004, 1646, 1597, 1477, 1447, 1399, 1345, 1286, 1156, 1105, 835, 774, 740, 695, 532, 472.

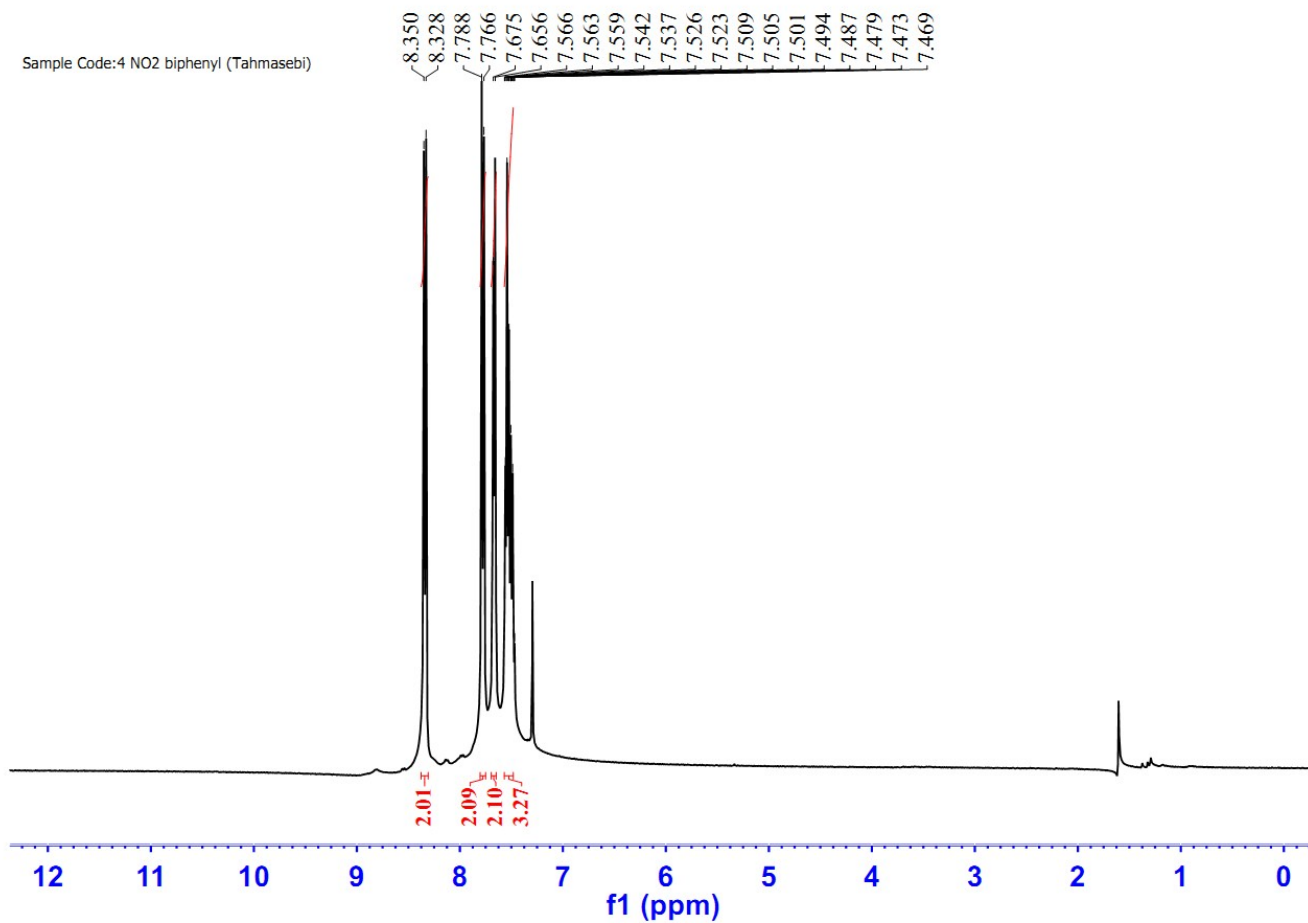

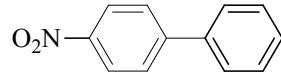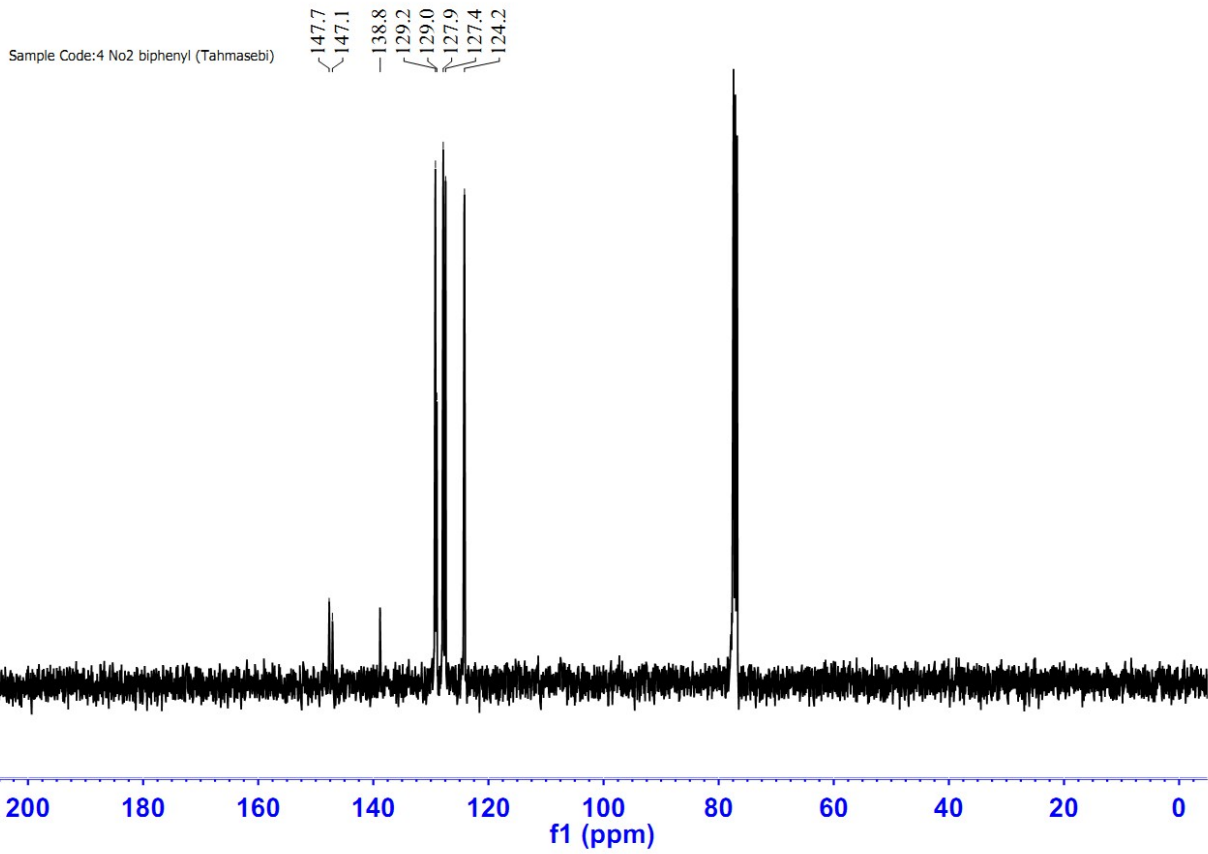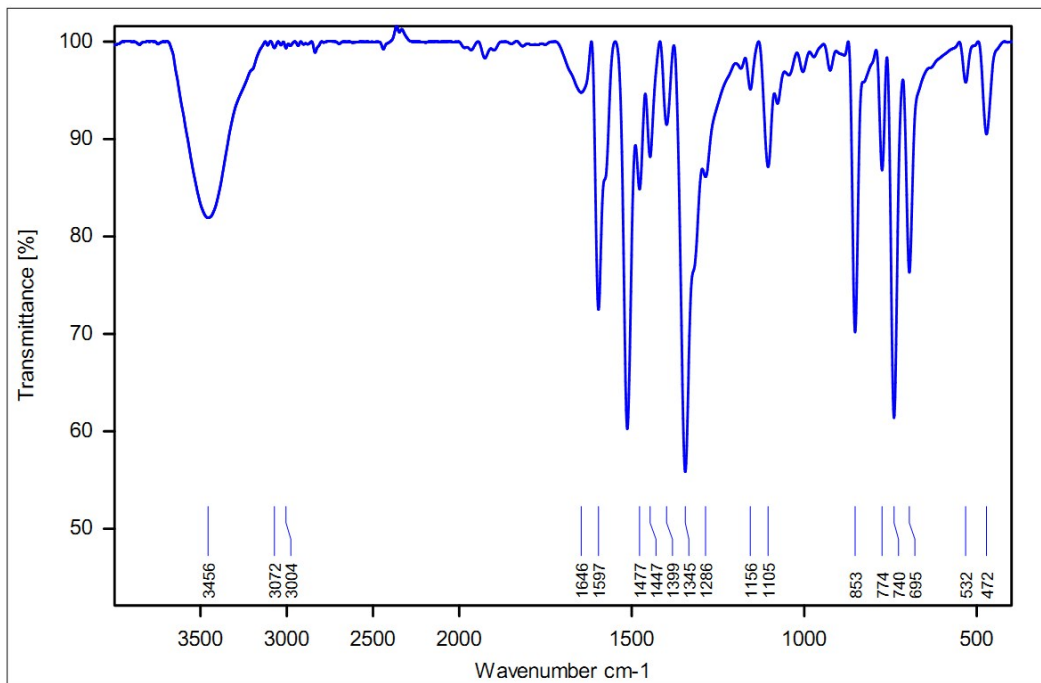

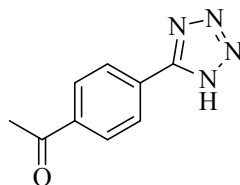

**1-(4-(1H-tetrazol-5-yl)phenyl)ethanone:**  $^1\text{H}$  NMR (400 MHz, DMSO):  $\delta_{\text{H}} = 8.21\text{--}8.19$  (m, 2H),  $8.18\text{--}8.16$  (m, 2H),  $2.66$  (s, 3H) ppm.

$^{13}\text{C}$  NMR (100 MHz,  $\text{CDCl}_3$ ):  $\delta = 197.9, 155.7, 138.9, 129.6, 128.8, 127.6, 27.4$  ppm.

IR (KBr)  $\text{cm}^{-1}$ : 3417, 3348, 3082, 2922, 2858, 1732, 1679, 1573, 1497, 1435, 1367, 1269, 1155, 1126, 1058, 993, 961, 841, 751, 700, 615, 589, 520, 488, 460.

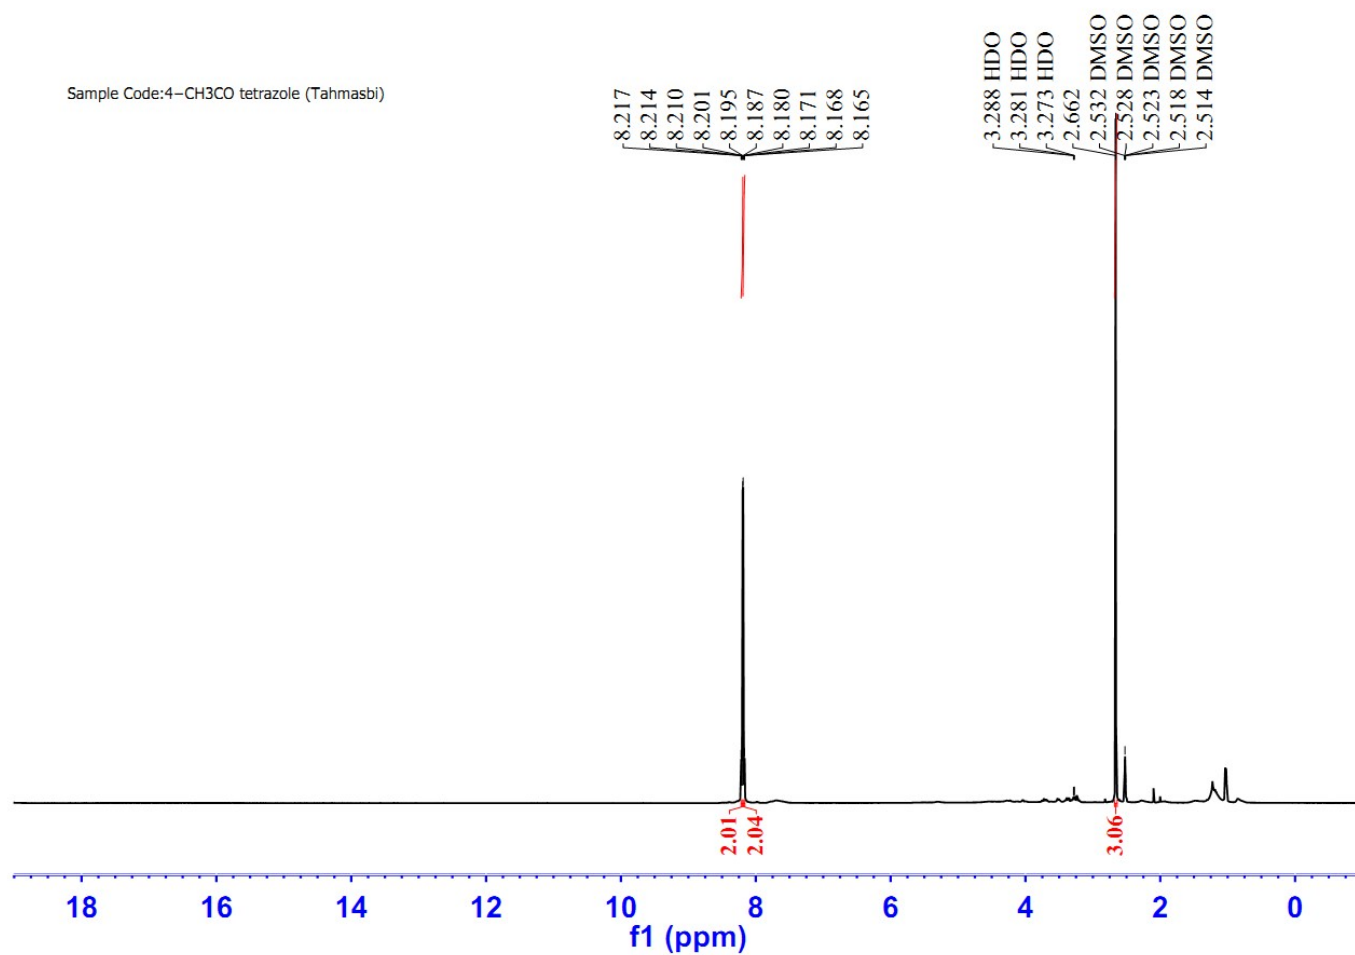

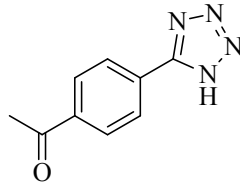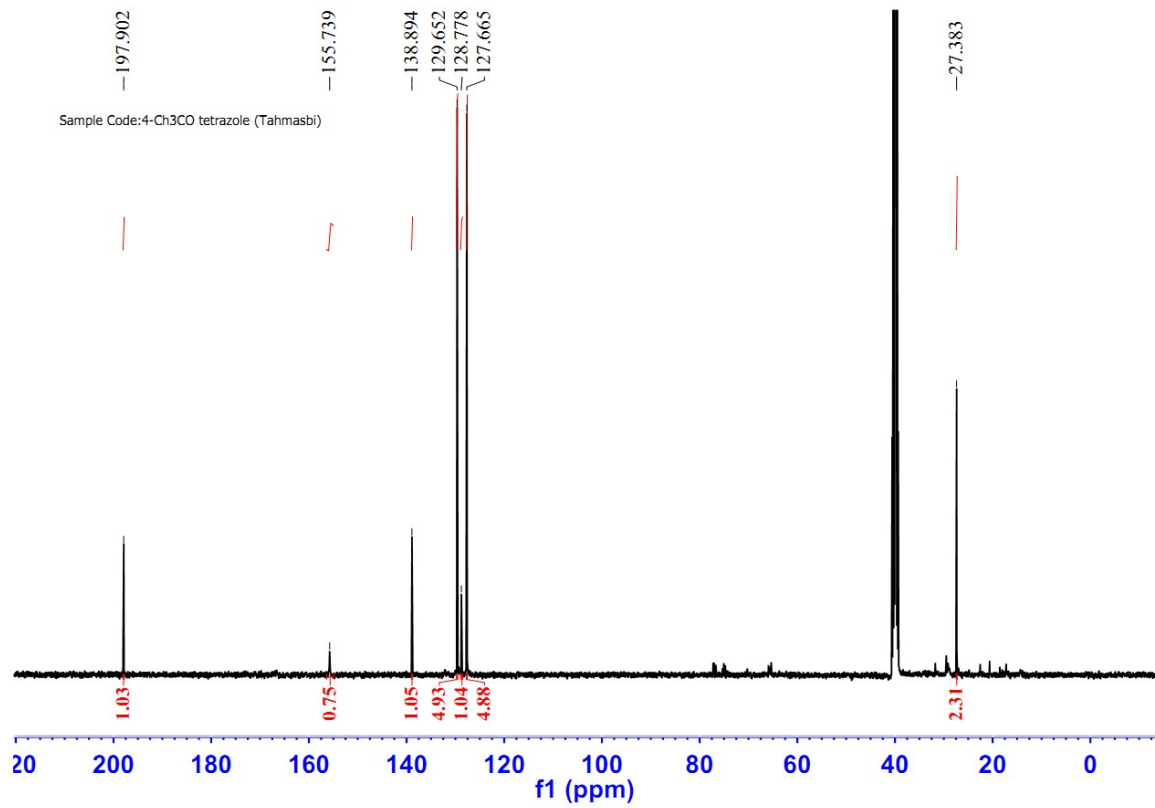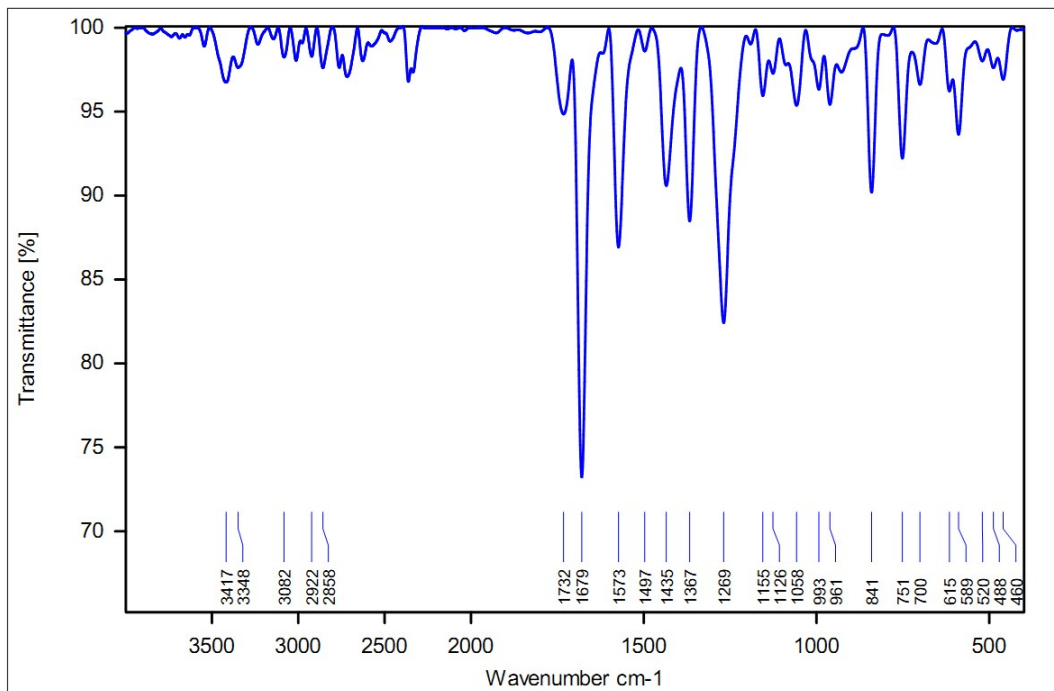

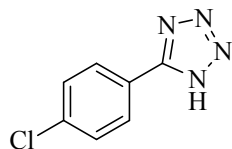

### 5-(4-chlorophenyl)-1H-tetrazole

$^1\text{H}$  NMR (400 MHz, DMSO):  $\delta_{\text{H}} = 8.09\text{--}8.05$  (m, 2H),  $7.73\text{--}7.70$  (m, 2H) ppm.

$^{13}\text{C}$  NMR (100 MHz,  $\text{CDCl}_3$ ):  $\delta = 155.4, 136.4, 130.1, 129.2, 123.7$  ppm.

IR (KBr)  $\text{cm}^{-1}$ : 3439, 3130, 3097, 2968, 2856, 2129, 1731, 1647, 1609, 1486, 1435, 1402, 1272, 1155, 1126, 1092, 1055,

990, 880, 834, 786, 742, 701, 556, 507, 465.

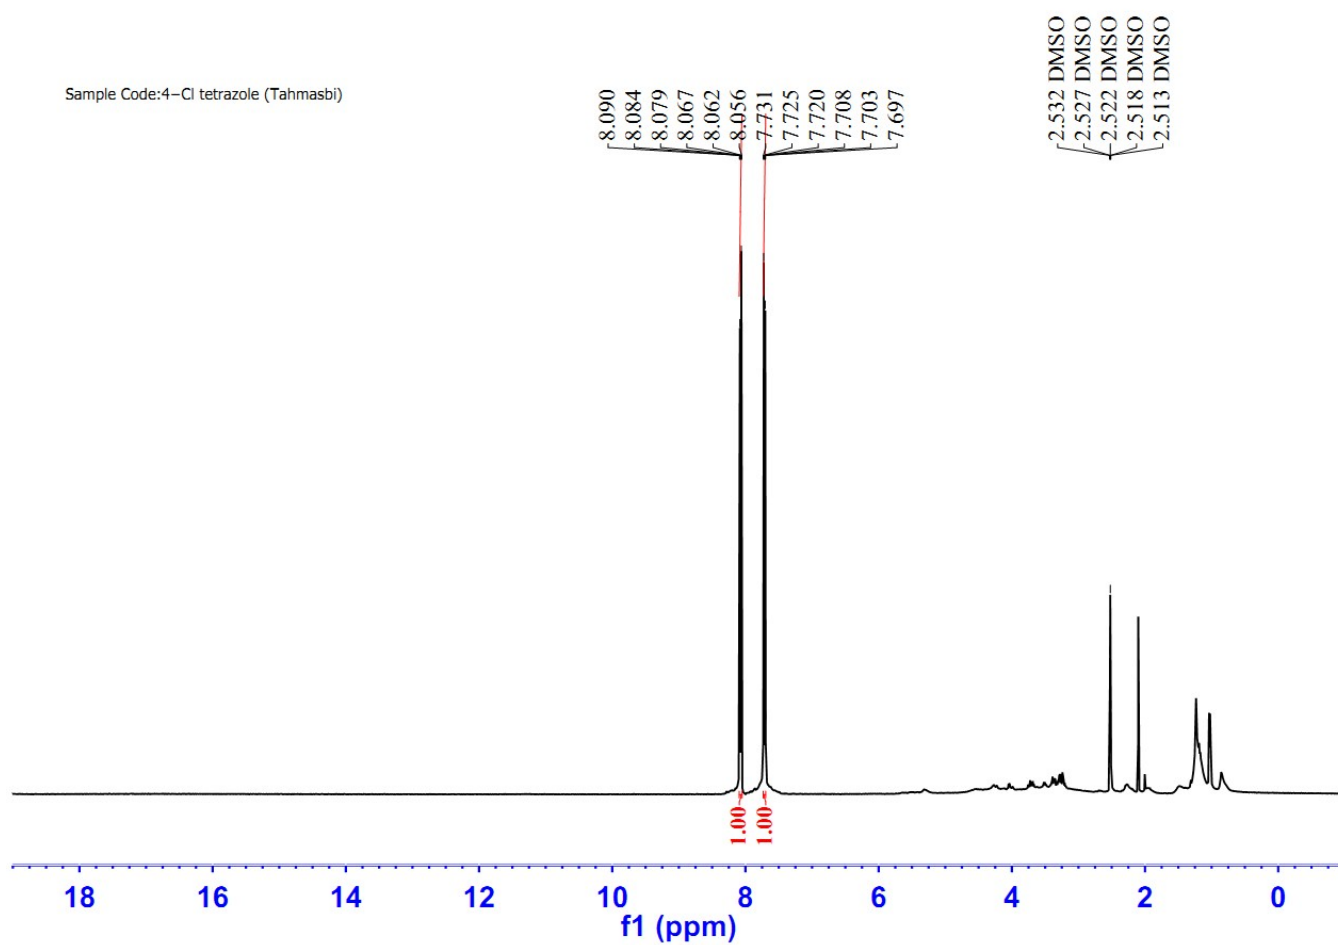

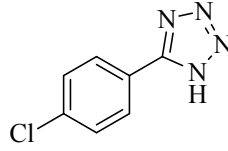

Sample Code: 4-Cl tetrazole (tahmasbi)

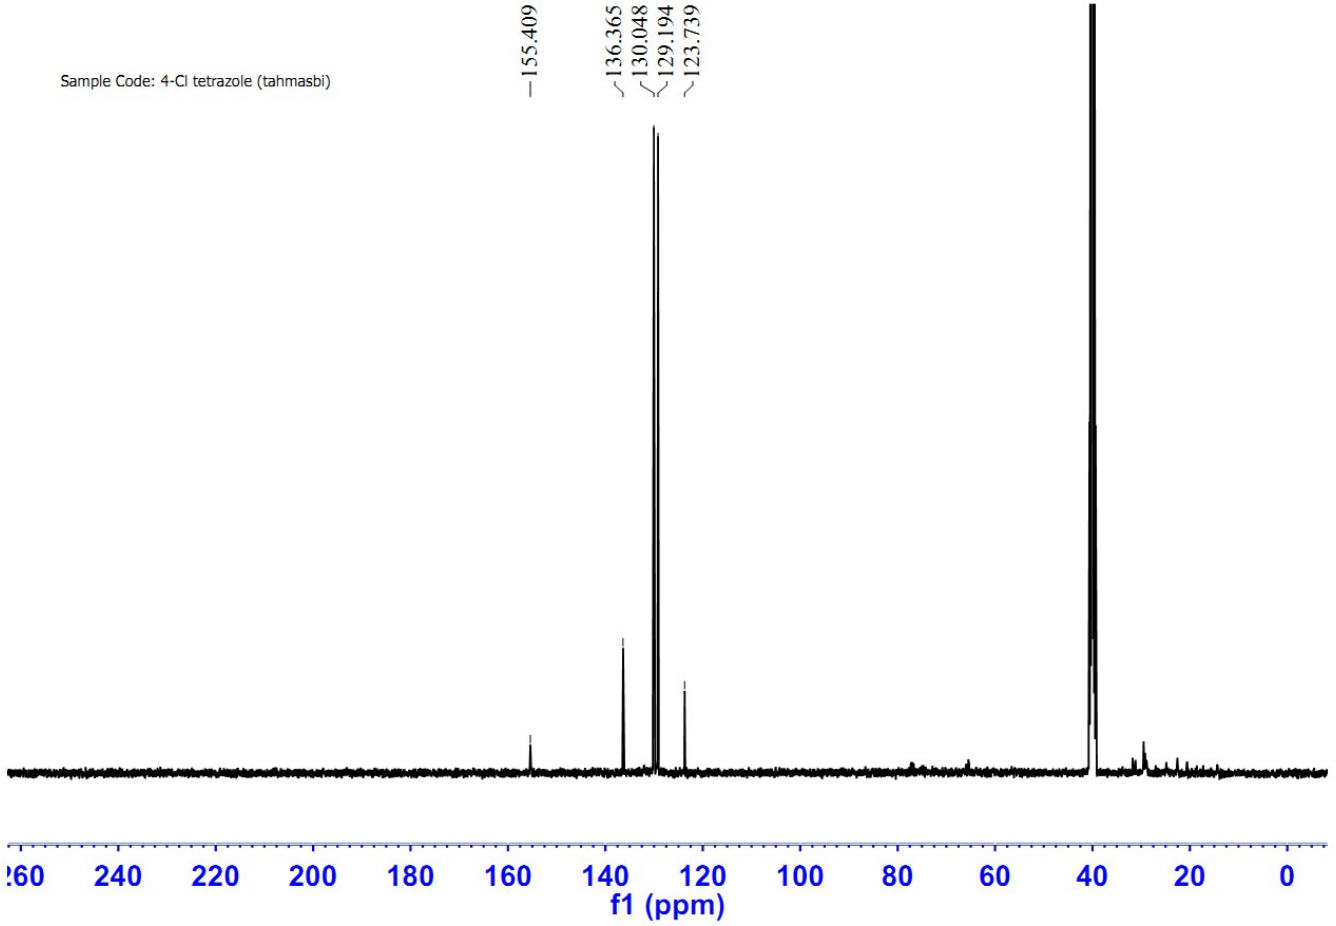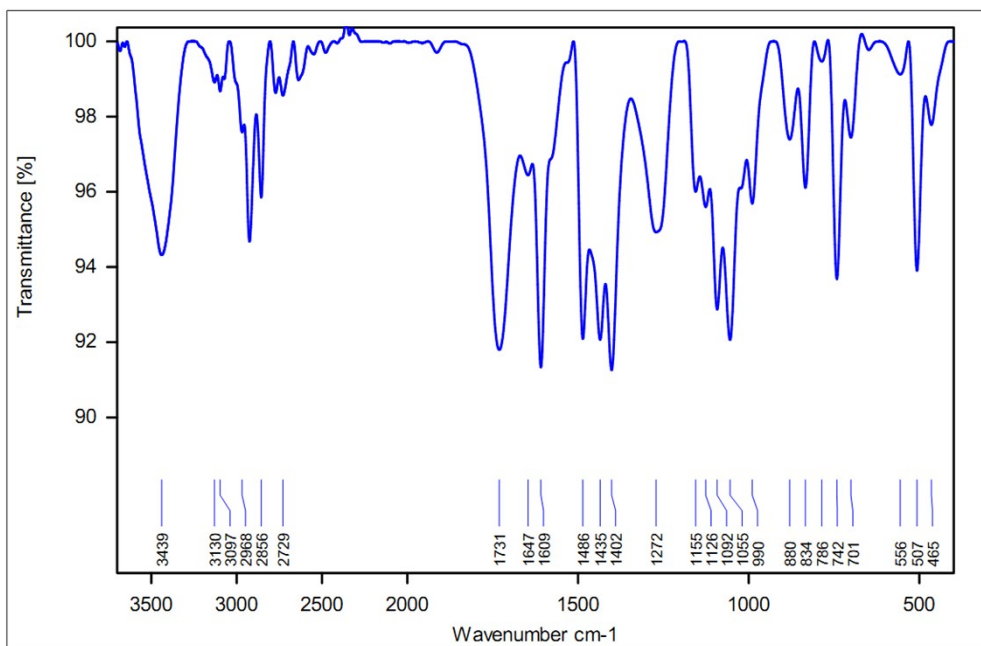

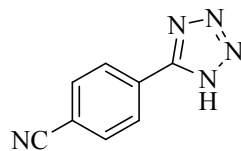

**4-(1H-tetrazol-5-yl)benzonitrile**

$^1\text{H}$  NMR (400 MHz, DMSO):  $\delta_{\text{H}} = 8.22\text{-}8.19$  (d,  $J = 12$  Hz, 2H),  $8.10\text{-}8.07$  (d,  $J = 12$  Hz, 2H) ppm.

$^{13}\text{C}$  NMR (100 MHz,  $\text{CDCl}_3$ ):  $\delta = 155.8, 133.8, 129.3, 128.1, 118.7, 113.9$  ppm.

IR (KBr)  $\text{cm}^{-1}$ : 3454, 3095, 2926, 2855, 2232, 1733, 1641, 1567, 1495, 1435, 1277, 1149, 1123, 989, 847, 748, 700, 553, 474, 441.

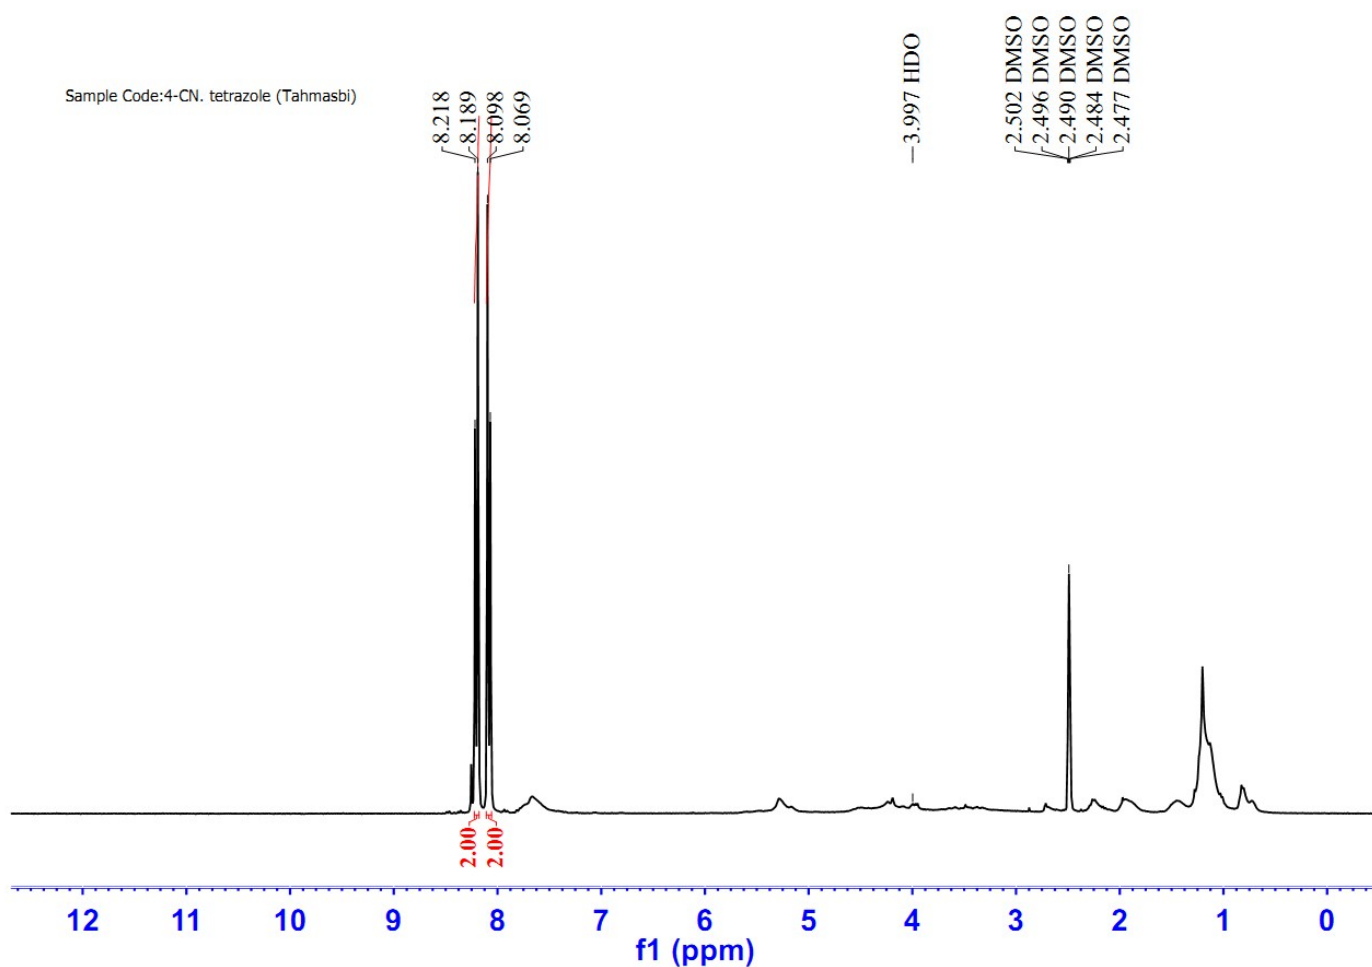



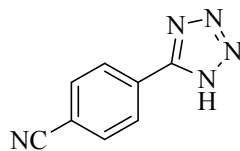

Sample Code: terephthalonitrile tetrazole (Tahmasbi)

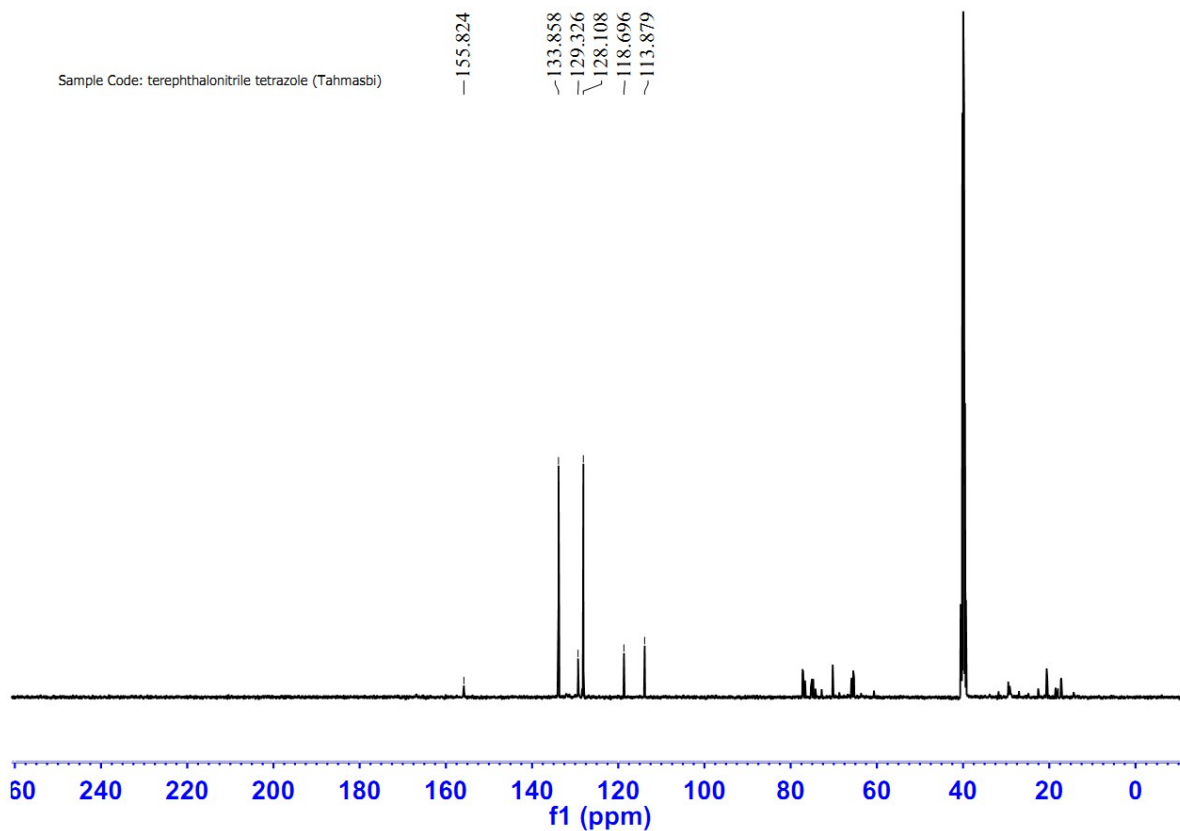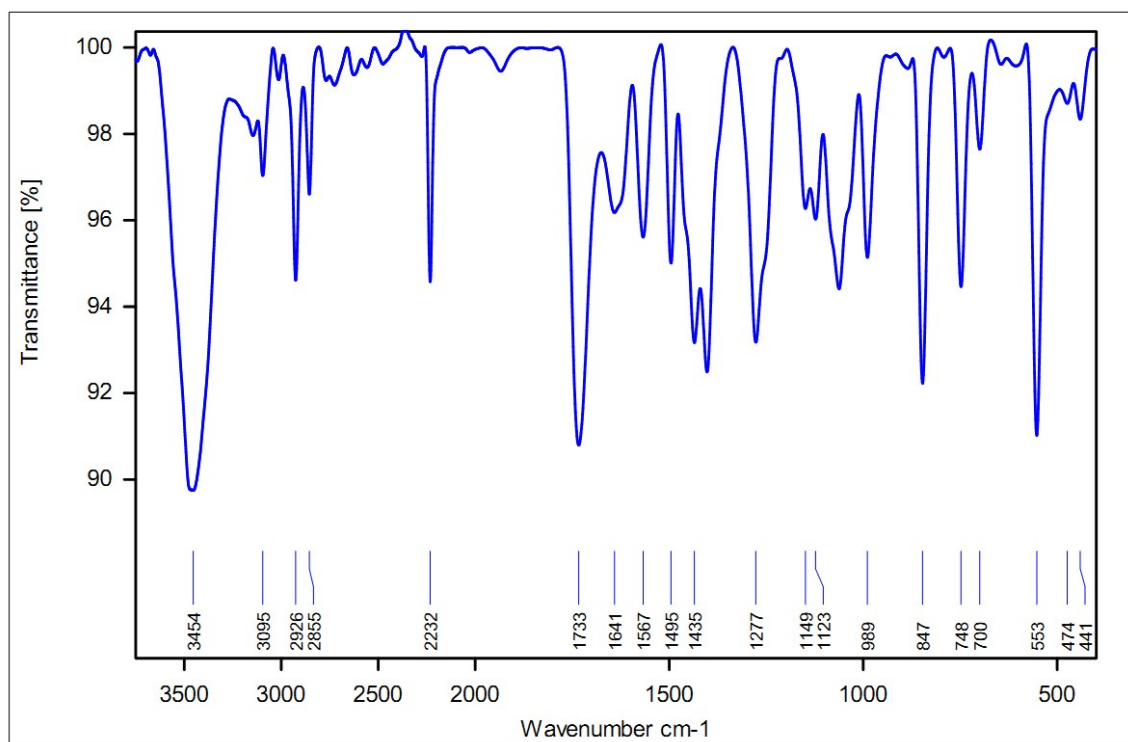

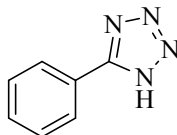

### 5-phenyl-1H-tetrazole

$^1\text{H}$  NMR (400 MHz, DMSO):  $\delta_{\text{H}} = 8.05\text{-}8.01$  (m, 2H),  $7.62\text{-}7.60$  (m, 1H),  $7.59\text{-}7.57$  (m, 2H) ppm.

$^{13}\text{C}$  NMR (100 MHz,  $\text{CDCl}_3$ ):  $\delta = 156.0, 131.5, 129.8, 127.4, 125.0$  ppm.

IR (KBr)  $\text{cm}^{-1}$ : 3446, 3129, 3057, 2982, 2923, 2795, 1734, 1607, 1563, 1486, 1462, 1405, 1258, 1126, 1057, 989, 958, 926, 786, 726, 572, 462.

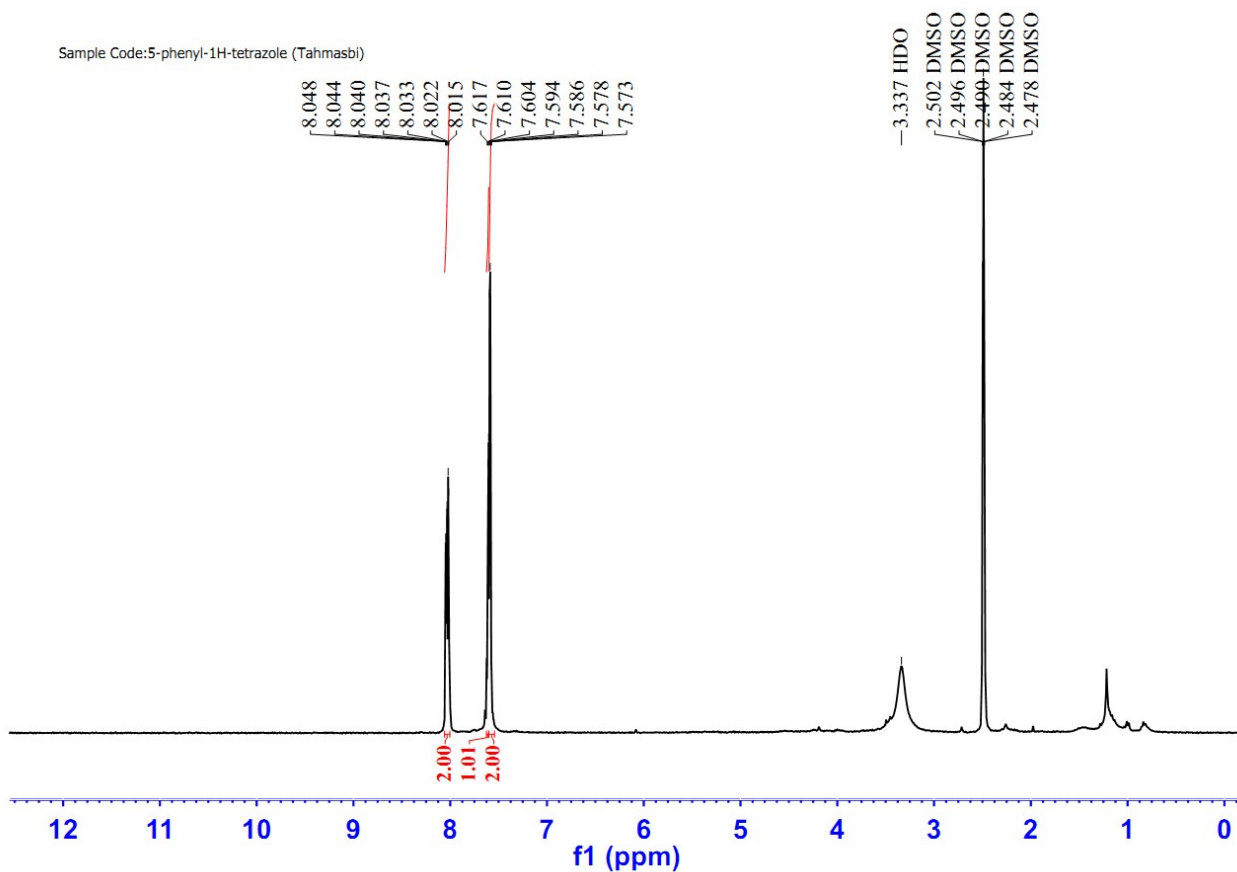

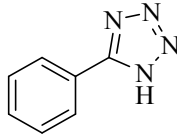

Sample Code:benznitrill tetrazole (Tahmasbi)

-156.025  
131.530  
129.857  
127.383  
125.012

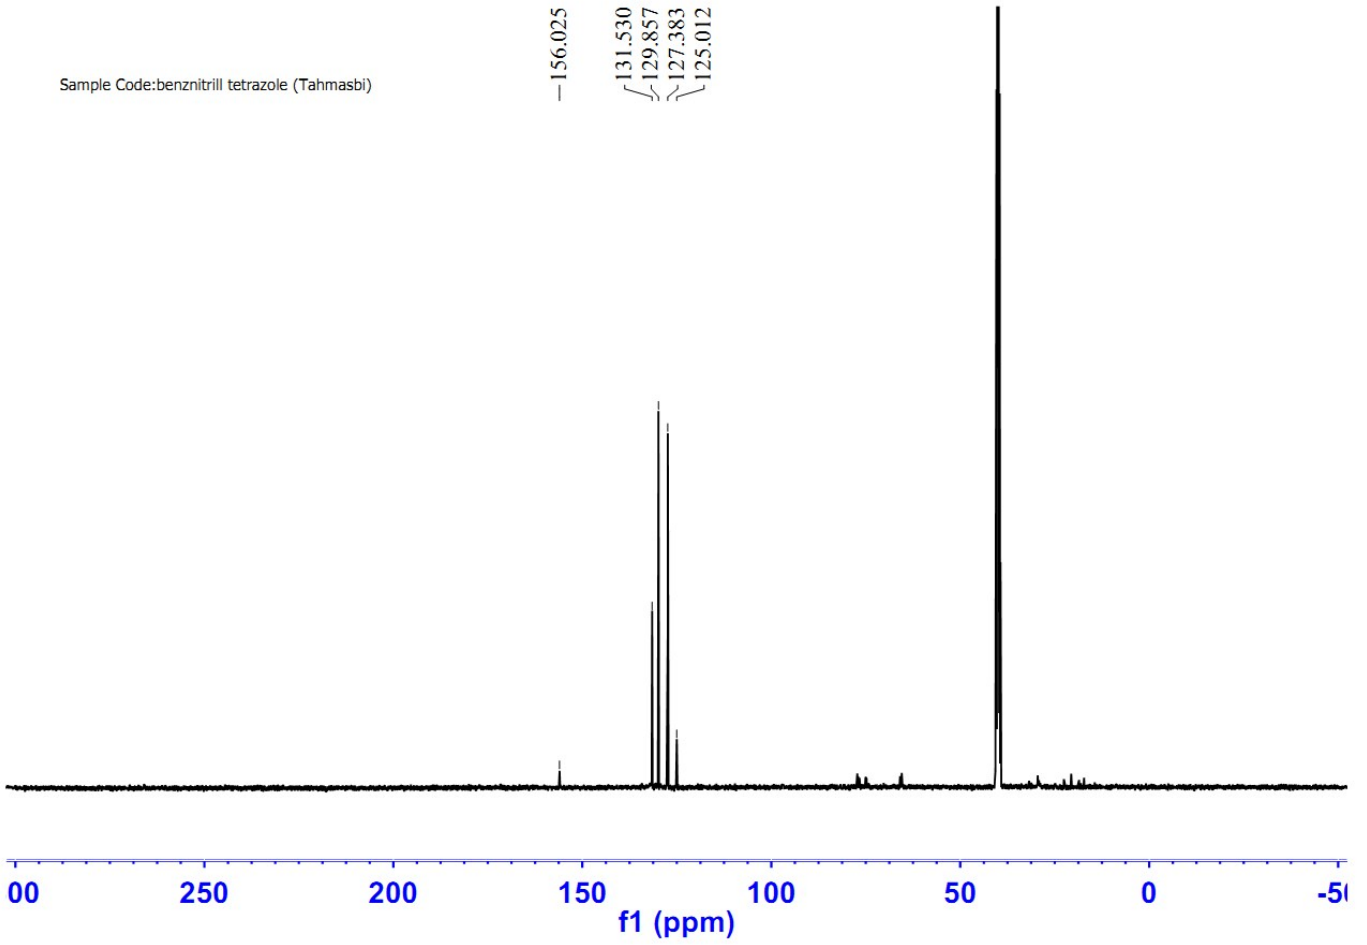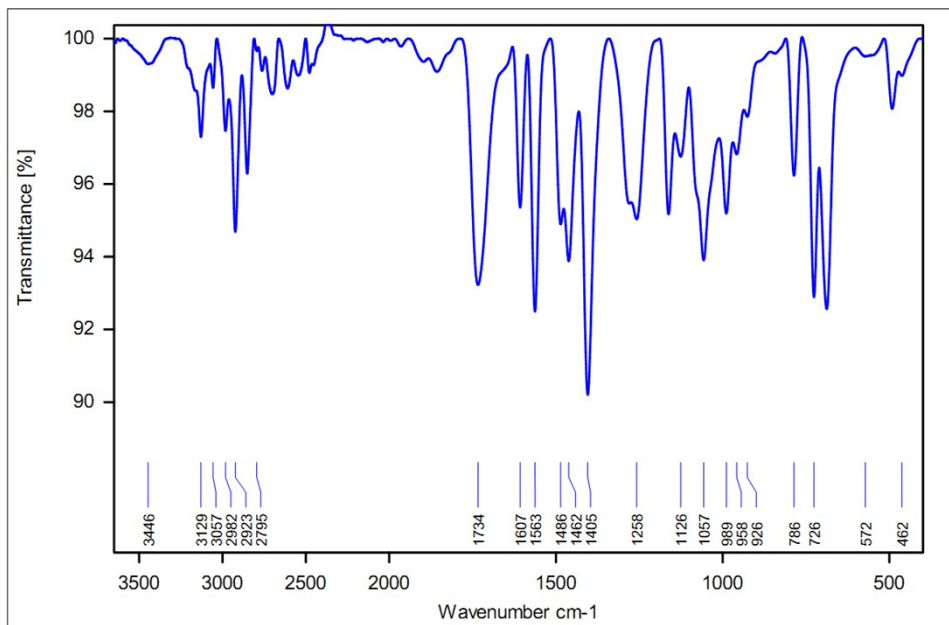

Supplement: c9nj06129k1.pdf [file c9nj06129k1.pdf]
